# Supplementary material
Source: PubMed Central journal article supplement (PMC7233186)
Supplement: NEJMc2005396_appendix.pdf [file NEJMc2005396_appendix.pdf]

## Supplementary Appendix

This appendix has been provided by the authors to give readers additional information about their work.

Supplement to: Chung S-C, Providencia R, Sofat R. Association between angiotensin blockade and incidence of influenza in the United Kingdom. *N Engl J Med*. DOI: 10.1056/NEJMc2005396

## Table of Contents

Supplementary table 1: Distribution of study populations by duration of medication use categories.

Supplementary table 2: definition of influenza

Supplementary table 1: Distribution of study populations by duration of medication use categories.

| ACEI duration categories | N       | %     |
|--------------------------|---------|-------|
| None                     | 4742017 | 87.12 |
| <6 months                | 149165  | 2.74  |
| 0.5-1.5 year             | 113699  | 2.09  |
| 1.5-2.5 year             | 67822   | 1.25  |
| 2.5-3.5 year             | 53219   | 0.98  |
| 3.5-5 year               | 66605   | 1.22  |
| 3.5-7 year               | 84788   | 1.56  |
| 7.5-10 year              | 62052   | 1.14  |
| >=10 year                | 103644  | 1.9   |

Supplementary table 2: definition of influenza

| ICD 10    | Term                                                                              |
|-----------|-----------------------------------------------------------------------------------|
| J10.0     | Influenza with pneumonia, other influenza virus identified                        |
| J10.1     | Influenza with other respiratory manifestations, other influenza virus identified |
| J10.8     | Influenza with other manifestations, other influenza virus identified             |
| J11.0     | Influenza with pneumonia, virus not identified                                    |
| J11.1     | Influenza with other respiratory manifestations, virus not identified             |
| J11.8     | Influenza with other manifestations, virus not identified                         |
| J09       | Influenza due to identified avian influenza virus                                 |
|           |                                                                                   |
| Read code | Term                                                                              |
| H27..00   | Influenza                                                                         |
| H2...00   | Pneumonia and influenza                                                           |
| H270000   | Influenza with bronchopneumonia                                                   |
| H27y100   | Influenza with gastrointestinal tract involvement                                 |
| H271000   | Influenza with laryngitis                                                         |
| H270.00   | Influenza with pneumonia                                                          |
| H27z.00   | Influenza NOS                                                                     |
| H271z00   | Influenza with respiratory manifestations NOS                                     |
| H270.11   | Chest infection - influenza with pneumonia                                        |
| H271100   | Influenza with pharyngitis                                                        |
| H27yz00   | Influenza with other manifestations NOS                                           |
| H270z00   | Influenza with pneumonia NOS                                                      |
| H271.00   | Influenza with other respiratory manifestation                                    |
| H27y000   | Influenza with encephalopathy                                                     |
| H27y.00   | Influenza with other manifestations                                               |
| H270100   | Influenza with pneumonia, influenza virus identified                              |
| Hyu0700   | [X]Influenza+other manifestations, virus not identified                           |
| Hyu0600   | [X]Influenza+oth respiratory manifestatns,virus not identified                    |
| Hyu0500   | [X]Influenza+other manifestations,influenza virus identified                      |
| Hyu0400   | [X]Flu+oth respiratory manifestations,'flu virus identified'                      |
